# Supplementary material for: Key role of ancillary ligands in imparting blue shift in electroluminescence wavelength in ruthenium polypyridyl light-emitting diodes
Source: Royal Society of Chemistry journal article supplement (doi:10.1039/c4nj01078g), 2014-01-01
Supplement: c4nj01078g1.pdf [file c4nj01078g1.pdf]

## Supporting Information

### Key Role of Ancillary Ligand in Imparting Blue Shift in Electroluminescence Wavelength in Ruthenium Polypyridyl Light- Emitting Diodes

*Hashem Shahroosvand<sup>a\*</sup>, Shiva Rezaei<sup>a</sup>, Ezeddin Mohajerani<sup>b</sup>, Malek mahmoudi<sup>b</sup>, Mohammad Ali Kamyabi<sup>a</sup>, Shohreh Nasiri<sup>a</sup>*

**Table S1.**

The wavelength of electroluminescence (EL) and photoluminescence (PL) emissions of reported ruthenium complexes.

| Complex/reactant                | $\lambda_{em}$<br>(nm) | $\lambda_{EL}$<br>(nm) | ref   |
|---------------------------------|------------------------|------------------------|-------|
| $Ru(bpy)_3^{2+}$                | 608                    | 608                    | 1,2,3 |
| $Ru(bpy)_3^{2+}/C_2O_4^{2-}$    | 610                    | 610                    | 4     |
| $Ru(bpy)_3^{2+}/C_2O_4^{2-}$    |                        | 591                    | 5     |
| $Ru(bpy)_3^{2+}/S_2O_8^{2-}$    | 625                    | 625                    | 4,6   |
| $Ru(bpy)_3^{2+}/TPrA$           | 610                    | 610                    | 7     |
| $Ru(dmbp)_3^{2+}/C_2O_4^{2-}$   |                        | 594                    | 5     |
| $Ru(phen)_3^{2+}$               | 590                    | 590                    | 8     |
| $Ru(phen)_3^{2+}/C_2O_4^{2-}$   |                        | 585                    | 5     |
| $Ru(dmphen)_3^{2+}/C_2O_4^{2-}$ |                        | 591                    | 5     |
| $Ru(terpy)_3^{2+}$              |                        | 660                    | 8     |
| $Ru(bpz)_3^{2+}$                | 585                    | 585                    | 9,10  |
| $Ru(bpz)_3^{2+}/S_2O_8^{2-}$    | 585                    | 590                    | 11    |
| $Ru(dp-bpy)_3^{2+}$             | 635                    | 635                    | 12    |

|                                                                              |     |     |    |
|------------------------------------------------------------------------------|-----|-----|----|
| $\text{Ru}(\text{dp-phen})_3^{2+}$                                           | 615 | 615 | 12 |
| $(\text{bpy})_2\text{Ru}(\text{bphb})^{2+}$                                  | 624 | 624 | 13 |
| $(\text{bpy})_2\text{Ru}(\text{bphb})^{2+} / \text{TPrA}$                    | 624 | 624 | 13 |
| $(\text{bpy})_2\text{Ru}(\text{bphb})^{2+} / \text{S}_2 \text{O}_8^{2-}$     | 624 | 624 | 13 |
| $[(\text{bpy})_2\text{Ru}]_2(\text{bphb})^{4+}$                              | 624 | 624 | 13 |
| $[(\text{bpy})_2\text{Ru}]_2(\text{bphb})^{4+} / \text{TPrA}$                | 624 | 624 | 13 |
| $[(\text{bpy})_2\text{Ru}]_2(\text{bphb})^{4+} / \text{S}_2 \text{O}_8^{2-}$ | 624 | 624 | 13 |
| $(\text{bpy})_2\text{Ru}(\text{AZA-bpy})^{2+} / \text{TPrA}$                 | 603 | 603 | 14 |
| $(\text{bpy})_2\text{Ru}(\text{AZA-bpy})^{2+} / \text{TPrA}$                 | 613 | 613 | 14 |
| $(\text{bpy})_2\text{Ru}(\text{CE-bpy})^{2+} / \text{TPrA}$                  |     | 650 | 15 |
| $(\text{bpy})_2\text{Ru}(\text{CE-bpy})^{2+} / \text{TPrA}$                  |     | 655 | 15 |
| $\text{Ru}(\text{v-bpy})_3^{2+}$                                             | 630 | 650 | 16 |
| $(\text{bpy})_2\text{Ru}(\text{DC-bpy})^{2+}$                                | 629 | 629 | 17 |
| $(\text{bpy})_2\text{Ru}(\text{DM-bpy})^{2+}$                                | 605 | 605 | 17 |
| $(\text{bpy})_2\text{Ru}(\text{dpen-bpy})^{2+} / \text{PF}_6^-$              | 612 | 612 | 18 |

|                                                         |      |      |    |
|---------------------------------------------------------|------|------|----|
| $\text{Ru(m-bpy)}_3^{2+} / \text{PF}_6^-$               | 609  | 612  | 18 |
| $\text{Ru(dtb-bpy)}_3^{2+} / \text{PF}_6^-$             | 610  | 611  | 18 |
| $(\text{bpy})_2\text{Ru(DIM)}^{2+}$                     | 600  | 600  | 19 |
| $(\text{bpy})_2\text{Ru(PBIm-H)}^{2+} / \text{PF}_6^-$  |      | 680  | 20 |
| $[\text{Ru(tpy)}(\text{tpy-COOEt})] / \text{PF}_6^-$    | 706  | 706  | 21 |
| $\text{Ru(DM-bpy)}_3^{2+}$                              | 604  | 615  | 22 |
| $(\text{bpy})_2\text{Ru(dbeb)}^{2+} / \text{PF}_6^-$    | 642  | 640  | 23 |
| $(\text{bpy})_2\text{Ru(pbq)}^{2+}$                     | 900  | 900  | 24 |
| $(\text{PBIm-H})_2\text{Ru(pbq)}^{2+}$                  | 945  | 945  | 24 |
| $(\text{PBIm-H})_2\text{Ru(acac)}^{2+}$                 | 850  | 880  | 24 |
| $[\text{Ru(PBIM-H)}_2]_2(\text{pbq})^{+2}$              | 1040 | 1040 | 24 |
| $\text{Ru(tpy)}(\text{trz})^{2+} / \text{PF}_6^-$       | 723  | 717  | 25 |
| $\text{Ru(tpy-COOEt)}(\text{trz})^{2+} / \text{PF}_6^-$ | 717  | 725  | 25 |
| $(\text{bpy})_2\text{Ru(Mt-bpy)}^{2+} / \text{PF}_6^-$  | 625  | 557  | 26 |

|                                                                                               |     |     |    |
|-----------------------------------------------------------------------------------------------|-----|-----|----|
| RuTRu                                                                                         | 625 | 598 | 26 |
| (bpy) <sub>2</sub> Ru(aa-bpy) <sup>2+</sup> /PF <sub>6</sub> <sup>-</sup>                     | 649 | 699 | 27 |
| Ru <sub>2</sub> (bpy) <sub>4</sub> (im-phen) / ClO <sub>4</sub> <sup>-</sup>                  | 638 | 655 | 28 |
| (bpy) <sub>2</sub> Ru(Eh-bpy) <sup>2+</sup> /PF <sub>6</sub> <sup>-</sup>                     | 427 | 600 | 29 |
| (bpy) <sub>2</sub> Ru(Hmh-bpy) <sup>2+</sup> /PF <sub>6</sub> <sup>-</sup>                    | 427 | 600 | 29 |
| (H <sub>2</sub> MPy <sub>3</sub> ,4DMPP)Ru(bpy) <sub>2</sub> Cl /PF <sub>6</sub> <sup>-</sup> | 655 | 656 | 30 |
| Ru <sub>2</sub> (bpy) <sub>2</sub> (tpy) <sub>2</sub> (BTB) <sup>2+</sup>                     | 680 | 710 | 31 |
| Ru <sub>2</sub> (bpy) <sub>2</sub> (tpy) <sub>2</sub> (4-TBN) <sup>3+</sup>                   | 676 | 680 | 31 |
| [Ru(bpy) <sub>2</sub> ] <sub>2</sub> (bmpa-bpy) <sup>+2</sup> / PF <sub>6</sub> <sup>-</sup>  | 642 | 596 | 32 |
| [Ru(bpy) <sub>2</sub> ] <sub>2</sub> (bmdpa-bpy) <sup>+2</sup> / PF <sub>6</sub> <sup>-</sup> | 638 | 570 | 32 |
| [Ru(bpy) <sub>2</sub> ] <sub>2</sub> (bmna-bpy) <sup>+2</sup> / PF <sub>6</sub> <sup>-</sup>  | 636 | 570 | 32 |

**m-bpy** = 4-methyl-2,2'-bipyridine

**dtb-bpy** = 4,4'-di-tert-butyl-2,2'-bipyridine

**dpen-bpy** = 4,4'-di-n-pentyl-2,2'-bipyridine

**DIM** = 4,7-dimethyl-1,10-phenanthroline

**PBIm-H** = 2-(2-pyridyl)-1H-benzoimidazole

**tpy** = 2,2',6',2''-terpyridine

**tpy-COOEt** = 2,2',6',2'', terpyridine-4'-carboxylic acid ethyl ester

**DM-bpy** = 4,4'-dimethyl-2,2'- bipyridine

**dbeb**= 4,4'-dibutyl ester-2,2'-bipyridine

**pbq**=2,3-bis(2-pyridyl)benzoquinoline

**acac**=acetylacetone

**trz**= 2-phenyl-4,6-dipyridin-2-yl-1,3,5-triazine

**RuTRu** = bis-2,2'-bipyridyl-ruthenium-bis-[2-((E)-4'-methyl-2,2'-bipyridinyl-4)-ethenyl]-thienyl-bis-2,2'-bipyridyl-ruthenium tetra hexafluorophosphate

**Mt-bpy** =4-methyl-4'-(2-thienylethenyl)-2,2'-bipyridine

**aa-bpy**= Acrylic acid 4'-acryloyloxymethyl-2,2'-bipyridinyl-4-ylmethyl ester

**im-phen** =1,2-bis(4-(1H-imidazo[4,5-f][1,10]phenanthroline-2-yl)phenoxy)ethane

**Eh-bpy** =4,4'-bis(3-ethylheptyl)-2,2'-bipyridine

**Hmh-bpy** =4-dihexylmethyl-4'-heptyl-2,2'-bipyridine

**H2MPy3,4DMPP** = meso-tris-3,4-dimethoxyphenyl-mono-(4-pyridyl)porphyrin

**4-TBN** = 4-(1H-tetrazol-5-yl)benzotrile

**BTB** = bis(1H-tetrazol-5-yl)benzene

**bpy** = 2,2'-bipyridine

**C<sub>2</sub> O<sub>4</sub><sup>2-</sup>** = oxalate ion

**S<sub>2</sub> O<sub>8</sub><sup>2-</sup>** = persulfate or peroxydisulfate

**TPrA** = tri-n-propylamine

**dmbp** = 4,4'-Me<sub>2</sub>bpy and DM-bpy = 4,4'-dimethyl-2,2'-bipyridine

**phen** = 1,10-phenanthroline

**terpy** = 2,2',2''-terpyridine

**bpz** =2,2'-bipyrazine

**dp-bpy** = 4,4'-biphenyl-2,2'-bipyridyl

**dp-phen** = 4,7-diphenyl-1,10-phenanthroline

**dmphen** = 4,7-dimethyl-1,10-phenanthroline

**bphb** = 1,4-bis(4'-methyl-2,2'-bipyridin-4-yl)benzene

**AZA-bpy** = 4-(N-aza-18-crown-6-methyl-2,2'-bipyridine

**CE-bpy** = bipyridine ligand where a crown ether (15-crown 5) is bound to the bpy ligand in the 3- and 3'-positions

**v-bpy** = 4-vinyl-4'-methyl-2,2'-bipyridine

**DC-bpy** = 4,4'-dicarboxy-2,2'-bipyridine

**PF<sub>6</sub><sup>-</sup>** = hexafluorophosphate

**bmpa-bpy** = bis(4'-methyl-2,2'-bipyridinyl-4-carbonyl)-(1,4-phenylenediamine)

**bmdpa-bpy** = bis(4'-methyl-2,2'-bipyridinyl-4-carbonyl)-(1,4-diphenylenediamine)

**bmna-bpy** = bis(4'-methyl-2,2'-bipyridinyl-4-carbonyl)-(1,4-naphthalenediamine)

**Table S2.** Absorption and emission properties of Ru(dpq) derivatives.

| <b>Compound</b>                               | <b>Absorption:</b><br>$\lambda_{\text{max}}$ , nm(log $\epsilon$ ) | <b>Emission:</b><br>$\lambda_{\text{em}}$ , nm ( $\theta_{\text{em}}$ ) | <b>Reference</b> |
|-----------------------------------------------|--------------------------------------------------------------------|-------------------------------------------------------------------------|------------------|
| [Ru(dpp) <sub>3</sub> ] <sup>2+</sup>         | 455 (1.54)                                                         |                                                                         | 33               |
| [Ru(dpq) <sub>3</sub> ] <sup>2+</sup>         | 500 (1.51)                                                         | 716                                                                     | 33               |
| [Ru(phen) <sub>2</sub> (dpp)] <sup>2+</sup>   | 465 (1.06)                                                         | 652                                                                     | 33               |
| [Ru(bpy) <sub>2</sub> (dpp)] <sup>2+</sup>    | 464 (1.15)                                                         | 660                                                                     | 33               |
| [Ru(phen) <sub>2</sub> (dpq)] <sup>2+</sup>   | 516 (1.10)                                                         | 756                                                                     | 33               |
| [Ru(bpy) <sub>2</sub> (dpq)] <sup>2+</sup>    | 517 (0.84)                                                         | 760                                                                     | 33               |
| [Ru(bpy) <sub>2</sub> (tpphz)] <sup>2+</sup>  | 449 (1.72)                                                         | 628 (0.100)                                                             | 34               |
| [Ru(bpy) <sub>2</sub> (dppx)] <sup>2+</sup>   | 446 (2.27)                                                         | 623 (0.088)                                                             | 34               |
| [Ru(bpy) <sub>2</sub> (dppm2)] <sup>2+</sup>  | 447 (2.28)                                                         | 630 (0.090)                                                             | 34               |
| [Ru(bpy) <sub>2</sub> (dppp2)] <sup>2+</sup>  | 441 (2.28)                                                         | 745 (<0.005)                                                            | 34               |
| [Ru(bpy) <sub>2</sub> (dppz)] <sup>2+</sup>   | 445 (1.63)                                                         | 631 (0.083)                                                             | 35               |
| [Ru(bpy) <sub>2</sub> (dpqp)] <sup>2+</sup>   | 457                                                                | 618 (0.76)                                                              | 35               |
| [Ru(phen) <sub>2</sub> (dicnq)] <sup>2+</sup> | 445 (4.33)                                                         | 613 (0.012)                                                             | 36               |
| [Ru(phen)(dicnq) <sub>2</sub> ] <sup>2+</sup> | 441 (4.31)                                                         | 610 (0.004)                                                             | 36               |
| [Ru(bpy) <sub>2</sub> (dicnq)] <sup>2+</sup>  | 439 (1.75)                                                         | 640 (0.0055)                                                            | 37               |
| [Ru(bpy) <sub>2</sub> (dppzc)] <sup>2+</sup>  | 448 (1.95)                                                         | 630 (0.009)                                                             | 37               |



|                                                              |            |             |    |
|--------------------------------------------------------------|------------|-------------|----|
| [Ru(bpy)(dppzc) <sub>2</sub> ] <sup>2+</sup>                 | 431 (2.51) |             | 37 |
| [Ru(phen) <sub>2</sub> (dppzc)] <sup>2+</sup>                | 431 (2.43) |             | 37 |
| [Ru(bpy) <sub>2</sub> (dpqOHCOOH)] <sup>2+</sup>             | 455 (1.78) | 620 (0.068) | 37 |
| [Ru(bpy) <sub>2</sub> (dpq(OH) <sub>2</sub> )] <sup>2+</sup> | 453 (1.56) | 627 (0.087) | 37 |
| [Ru(phen) <sub>2</sub> (dppz)] <sup>2+</sup>                 | 439(2.23)  | 618         | 38 |
| [Ru(phen) <sub>2</sub> (dppx)] <sup>2+</sup>                 | 440(2.1)   | 610         | 38 |
| [Ru(phen) <sub>2</sub> (dppm2)] <sup>2+</sup>                | 441(2.25)  | 615         | 38 |
| [Ru(phen) <sub>2</sub> (dppa)] <sup>2+</sup>                 | 438(2.34)  | 612         | 38 |
| [Ru(phen) <sub>2</sub> (dppb)] <sup>2+</sup>                 | 439(2.14)  | 660         | 38 |
| [Ru(phen) <sub>2</sub> (dppp2)] <sup>2+</sup>                | 439(2.12)  | 620         | 38 |
| [Ru(phen) <sub>2</sub> (dppp3)] <sup>2+</sup>                | 439(2.11)  | 616         | 38 |
| [Ru(phen) <sub>2</sub> (dppn)] <sup>2+</sup>                 | 443(2.56)  | 606         | 38 |

**Dpp** 2,3-bis(2'-pyridyl)pyrazine)

**dpq** Dipyrido[3,2-*f*:2',3-*h*]quinoxaline

**tpphz** Tetrapyrdo[3,2-*a*:2',3'-*c*:3'',2''-*h*:2,3'''-*j*]phenazine

**dppx** 11,12-Dimethyl-dipyrido[3,2-*a*:2',3'-*c*]phenazine

**dppm** 10-Dimethyl-dipyrido[3,2-*a*:2',3'-*c*]phenazine

**dppp** Pyrido[2',3':5,6]pyrazino[2,3-*f*][1,10]phenanthroline

**dppz** Dipyrido[3,2-*a*:2',3'-*c*]phenazine

**dpqp** Dipyrido[2,3-*a*:3',2'-*c*]quinolino[3,2-*f*]phenazine

**dicnq** 6,7-dicyanodipyrido[2,2-*d*:2',3'-*f*]quinoxaline

**dppzc** dipyrido[3,2-*a*:2',3'-*c*]-phenazine-2-carboxylic acid

**dppn** 4,5,9,16-Tetraaza-dibenzo[*a,c*]naphthacene

**Figure S2.** Cyclic voltammogram of S104 in 0.1 M TBAP/MeCN solution at a Pt disk electrode (2 mm diameter),  $T = 25\text{ }^{\circ}\text{C}$ , scan rate  $100\text{ mVs}^{-1}$ : (A) Scan from -0.2 to -1.7 V; (B) scan from 0.2 to 1.7 V.

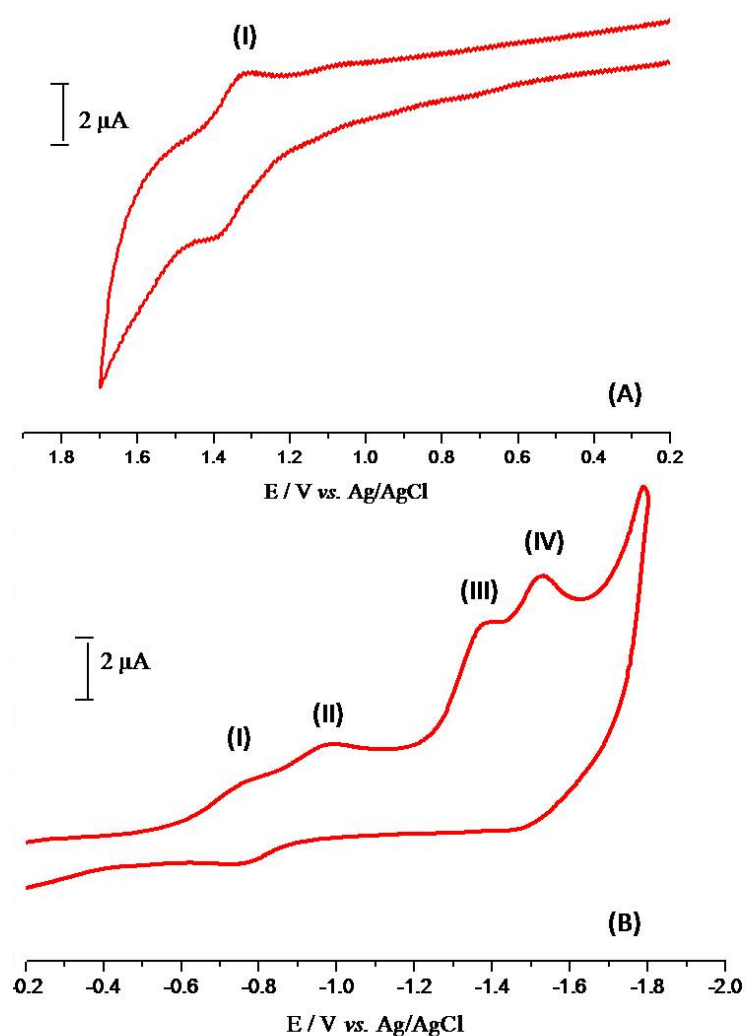

## References:

- [1] N. Tokel, A. J. Bard, *J. Am. Chem. Soc.* **1972**, *94*, 2862.
- [2] R. S. Glass, L. R. Faulkner, *J. Phys. Chem.* **1981**, *85*, 1160.
- [3] W. L. Wallace, A. J. Bard, *J. Phys. Chem.* **1979**, *83*, 1350.
- [4] I. Rubinstein, A. J. Bard, *J. Am. Chem. Soc.* **1981**, *103*, 512.
- [5] F. Kanoufi, A. J. Bard, *J. Phys. Chem. B.* **1999**, *103*, 10469.
- [6] H. S. White, A. J. Bard, *J. Am. Chem. Soc.* **1981**, *104*, 6891.
- [7] J. K. Leland, M. J. Powell, *J. Electroanal. Chem.* **1991**, *318*, 91.
- [8] N. E. Tokel-Takvoryan, R. E. Hemingway, A. J. Bard, *J. Am. Chem. Soc.* **1973**, *95*, 6582.
- [9] J. Velasco, I. Rubinstein, R. J. Crutchley, A. B. P. Lever, A. Bard, *Inorg. Chem.* **1983**, *22*, 822
- [10] J. G. Velasco, *J. Phys. Chem.* **1988**, *92*, 2202.
- [11] S. Yamazaki-Nishida, Y. Harima, K. Yamashita, *J. Electroanal. Chem.* **1990**, *283*, 455.
- [12] J. Ouyang, A. J. Bard, *Chem. Soc. Jpn.* **1988**, *61*, 17.
- [13] M. M. Richter, A. J. Bard, W. Kim, R. S. Schmechl, *Anal. Chem.* **1998**, *70*, 310.
- [14] B. D. Muegge, M. M. Richter, *Anal. Chem.* **2002**, *74*, 547.
- [15] R. Y. Lai, M. Chiba, N. Kitamura, A. Bard, *Anal. Chem.* **2002**, *74*, 551
- [16] H. Abruna, A. J. Bard, *J. Am. Chem. Soc.* **1982**, *104*, 2641.
- [17] D. Bruce, J. McCall, Richter, M. M. *Analyst.* **2002**, *127*, 125.
- [18] S. Bernhard, J. Barron, P. Houston, H. Abruna, J. Ruglovksy, X. Gao, G. Malliaras, *J. Am. Chem. Soc.* **2002**, *124*, 13624.
- [19] J. Yang, K. Gordon, *Chem. Phys. Lett.* **2003**, *372*, 577.
- [20] Y. Chuai, D. N. Lee, C. Zhen, J. H. Min, B. H. Kimb, D. Zou, *Synth. Met.* **2004**, *145*, 259.
- [21] H. J. Bolink, L. Cappelli, E. Coronado, P. Gavina, *Inorg. Chem.* **2005**, *44*, 5966.
- [22] S. M. Chang, C. H. Fan, C. C. Lai, Y. C. Chao, S. C. Hu, *Surf. Coat. Technol.* **2006**, *200*, 3289.
- [23] H. Xia, Y. Zhu, D. Lu, M. Li, C. Zhang, B. Yang, Y. Ma, *J. Phys. Chem. B.* **2006**, *110*, 18718.
- [24] S. Xun, J. Zhang, X. Li, D. Ma, Z. Y. Wang, *Synth. Met.* **2008**, *158*, 484.

- [25] H. J. Bolink, E. Coronado, R. D. Costa, P. Gavina, E. Orti, S. Tatay, *Inorg. Chem.* **2009**, *48*, 3907.
- [26] M. Li, J. Liu, L. Sun, J. Pan, C. Zhao, *J. Organomet. Chem.* **2008**, *693*, 46.
- [27] E. Puodziukynaite, J. L. Oberst, A. L. Dyer, J. R. Reynolds, *J. Am. Chem. Soc.* **2012**, *134*, 968.
- [28] C. Ju, C. H. Chen, C. L. Yuan, K. Z. Wang, *Thin Solid Films.* **2011**, *519*, 3883.
- [29] I. Oner, C. Sahin, C. Varlikli, *Dyes Pig.*, **2012**, *95*, 23.
- [30] R. Pyati, M. Richter, *Annu. Rep. Prog. Chem., Sect. C*, **2007**, *103*, 12.
- [31] S. Stagni, A. Palazzi, S. Zacchini, B. Ballarin, C. Bruno, M. Marcaccio, F. Paolucci, M. Monari, M. Carano, A. J. Bard, *Inorg. Chem.* **2006**, *45*, 695.
- [32] M. Li, J. Liu, C. Zhao, L. Sun, *J. Organomet. Chem.* **2006**, *691*, 4189.
- [33] A. W. Wallace, W. R. Murphy, J. D. Petersen, *Inorg. Chim. Acta.* **1989**, *166*, 41.
- [34] Y. Sun, D. A. Lutterman, C. Turro, *Inorg. Chem.* **2008**, *47*, 6427.
- [35] Y. Sun, S. N. Collins, L. E. Joyce, C. Turro, *Inorg. Chem.* **2010**, *49*, 4257.
- [36] A. Ambroise, B. G. Maiya, *Inorg. Chem.* **2000**, *39*, 4264.
- [37] B. Gholamkhash, K. Koike, N. Negishi, H. Hori, K. Takeuchi, *Inorg. Chem.* **2001**, *40*, 756.
- [38] R. M. Hartshorn, J. K. Barton, *J. Am. Chem. Soc.*, **1992**, *114*, 5919.
